# Supplementary material for: Buffering Mechanisms in Aging: A Systems Approach Toward Uncovering the Genetic Component of Aging
Source: PubMed Central journal article supplement (PMC1963511; doi:10.1371/journal.pcbi.0030170), 2007-08-31
Supplement: pcbi.0030170.sg001.pdf [file pcbi.0030170.sg001.pdf]

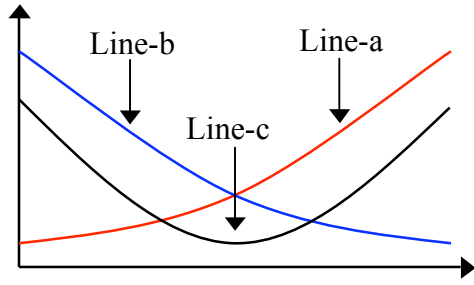

Figure S1: Trends of Genotypic Frequency with Age.  
Line-a - longevity genes; Line-b - age related diseases genes;  
Line-c - buffered age related disease genes.
