# Supplementary material for: Buffering Mechanisms in Aging: A Systems Approach Toward Uncovering the Genetic Component of Aging
Source: PubMed Central journal article supplement (PMC1963511; doi:10.1371/journal.pcbi.0030170), 2007-08-31
Supplement: pcbi.0030170.sg003.pdf [file pcbi.0030170.sg003.pdf]

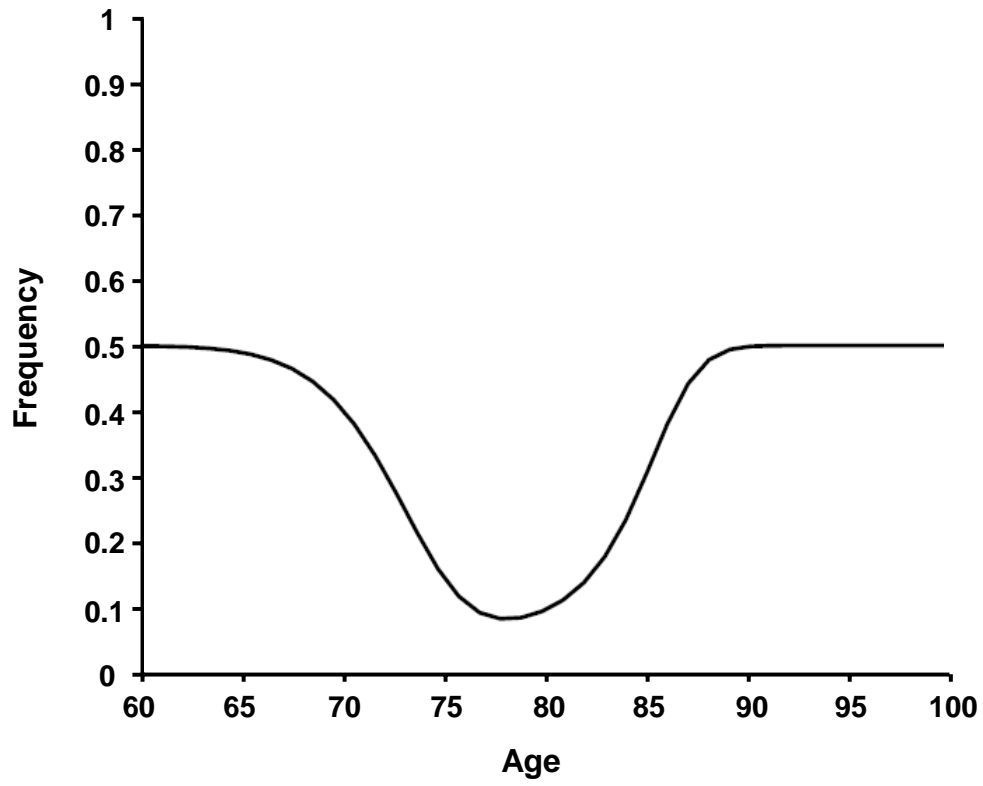

**FIGURE 3S: Trend of Genotypic Frequency in simulated Age-structured population**
